# Supplementary material
Source: Springer Nature journal article supplement (https://www.springermedizin.de/resource/supplementary/12958_2010_867_MOESM8_ESM.pdf/9569054)

# ADAM-1

# ADAM-2

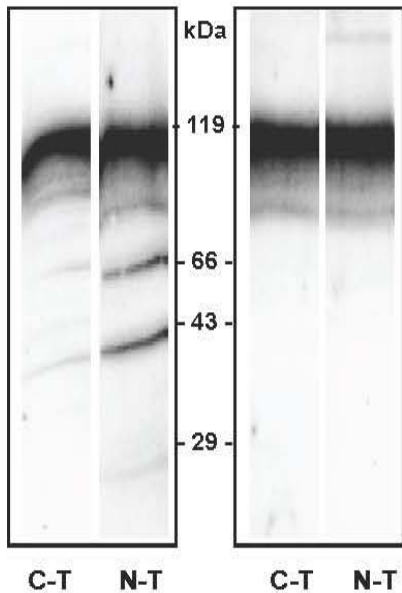

Supplement: MOESM8 [file 9569054]
